# Supplementary material
Source: publisher site journal article supplement (http://e-cmh.org/upload/media/cmh-2021-0355-suppl9.pdf)
Supplement: Supplementary file 1 [file cmh-2021-0355-suppl9.pdf]

**Supplementary Table 3.** Distribution of non-cancer cause of death in liver cancer patients by time since cancer diagnosis

| Rank | 0 year ≤ time since diagnosis < 5 years |              | 5 years ≤ time since diagnosis < 10 years |            | 10 years ≤ time since diagnosis |           |
|------|-----------------------------------------|--------------|-------------------------------------------|------------|---------------------------------|-----------|
|      | Cause of death                          | Count*       | Cause of death                            | Count*     | Cause of death                  | Count*    |
| 1    | Diseases of liver                       | 3,198 (37.2) | Diseases of liver                         | 410 (25.0) | Diseases of liver               | 99 (19.3) |
| 2    | Viral hepatitis                         | 974 (11.3)   | Viral hepatitis                           | 144 (8.8)  | Heart diseases                  | 56 (10.9) |
| 3    | Cerebrovascular diseases                | 614 (7.1)    | Cerebrovascular diseases                  | 142 (8.7)  | Cerebrovascular diseases        | 46 (9.0)  |
| 4    | Intentional self-harm                   | 594 (6.9)    | Heart diseases                            | 129 (7.9)  | Viral hepatitis                 | 30 (5.8)  |
| 5    | Heart diseases                          | 480 (5.6)    | Intentional self-harm                     | 96 (5.9)   | Pneumonia                       | 29 (5.7)  |

Values are presented as number (%).

Diseases of liver and viral hepatitis combined: 4,172 (48.5), 554 (33.8), 129 (25.1) for less than 5 years, 5 to 10 years, greater than 10 years, respectively. Patients diagnosed with primary liver cancer from January 1, 2000 to December 31, 2016 who were followed up to December 31, 2017. Patients who were aged under 20 years at diagnosis were excluded.

\*Percentage among non-cancer deaths of each period (number of non-cancer deaths during each period: 0–5 years, 8,594; 5–10 years, 1,640; >10 years, 513).
